# Supplementary material for: Dual signal amplification for microRNA-21 detection based on duplex-specific nuclease and invertase
Source: PubMed Central journal article supplement — RSC Adv. 2020 Mar 18;10(19):11257–62. doi: 10.1039/c9ra10657j (PMC9050473; doi:10.1039/c9ra10657j), 2020-03-18
Supplement: RA-010-C9RA10657J-s001.pdf [file RA-010-C9RA10657J-s001.pdf]

## Electronic Supplementary Information

### Dual signal amplification for microRNA-21 detection based on duplex-specific nuclease and invertase

Xitong Huang, Zhiming Xu, Ji-Hua Liu, Bo-Yang Yu\*, and Jiangwei Tian\*

State Key Laboratory of Natural Medicines, Jiangsu Key Laboratory of TCM Evaluation and Translational Research, Research Center for Traceability and Standardization of TCMs, School of Traditional Chinese Pharmacy, China Pharmaceutical University, Nanjing 211198, P.R. China

\* Corresponding authors, Bo-Yang Yu, Email: boyangyu59@163.com; Jiangwei Tian,

Email: jwtian@cpu.edu.cn

### Table of Contents

|                             |     |
|-----------------------------|-----|
| Supplementary Tables.....   | S-2 |
| Supplementary Figures ..... | S-4 |
| References.....             | S-7 |

## Supplementary Tables

**Table S1.** Oligonucleotides designed in the present study

| <b>Name</b>         | <b>Sequence(5' to 3')</b>                                |
|---------------------|----------------------------------------------------------|
| <b>miRNA-21</b>     | UAGCUUAUCAGACUGAUGUUGA                                   |
| <b>Target DNA</b>   | TAGCTTATCAGACTGATGTTGA                                   |
| <b>DNA strand 1</b> | Biotin-AAAAATCAACATCAGTCTGATAAGCTA-(A) <sub>5</sub> -SH  |
| <b>DNA strand 2</b> | Biotin-AAAAATCAACATCAGTCTGATAAGCTA-(A) <sub>10</sub> -SH |
| <b>DNA strand 3</b> | Biotin-AAAAATCAACATCAGTCTGATAAGCTA-(A) <sub>15</sub> -SH |
| <b>DNA strand 4</b> | Biotin-AAAAATCAACATCAGTCTGATAAGCTA-(A) <sub>20</sub> -SH |
| <b>DNA strand 5</b> | Biotin-AAAAATCAACATCAGTCTGATAAGCTA-(A) <sub>25</sub> -SH |
| <b>Mismatch-1</b>   | UAGCUUAUCAC <u>A</u> CUGAUGUUGA                          |
| <b>Mismatch-2</b>   | UAGCAA <u>A</u> UCAGAC <u>A</u> GGAUGUUGA                |
| <b>Mismatch-3</b>   | UAGCUUA <u>A</u> CAGACUGAUGAAGA                          |
| <b>hsa-miR-200c</b> | CGTCTTACCCAGCAGTGTTTG                                    |
| <b>hsa-miR-4640</b> | UGGGCCAGGGAGCAGCUGGUGGG                                  |
| <b>hsa-miR-423</b>  | UGAGGGGCAGAGAGCGAGACUUU                                  |
| <b>NC</b>           | UUGUACUACACAAAAGUACUG                                    |

**Table S2.** Analytical performance of reported methods and proposed method for miRNA detection

| Limit of detection | Linear range  | Strategy                                    | References                        |
|--------------------|---------------|---------------------------------------------|-----------------------------------|
| 1.1 nM             | None          | Electrochemiluminescence                    | Shamsi <i>et al.</i> <sup>1</sup> |
| 500 pM             | 0.5 nM–200 nM | Fluorometric assay                          | Song <i>et al.</i> <sup>2</sup>   |
| 230 pM             | 0 - 6.25 nM   | Fluorometric assay                          | Lee <i>et al.</i> <sup>3</sup>    |
| 80 pM              | 49.6 pM–50 nM | Chemiluminescence                           | Wang <i>et al.</i> <sup>4</sup>   |
| 8 pM               | 25 pM–1 nM    | Chemiluminescence                           | Li <i>et al.</i> <sup>5</sup>     |
| 2.79 pM            | 10 pM–100 nM  | H <sub>2</sub> O <sub>2</sub> decomposition | Lei <i>et al.</i> <sup>6</sup>    |
| 1.8 pM             | 20 pM–200 pM  | DSN-assisted signal amplification           | This work                         |

## Supplementary Figures

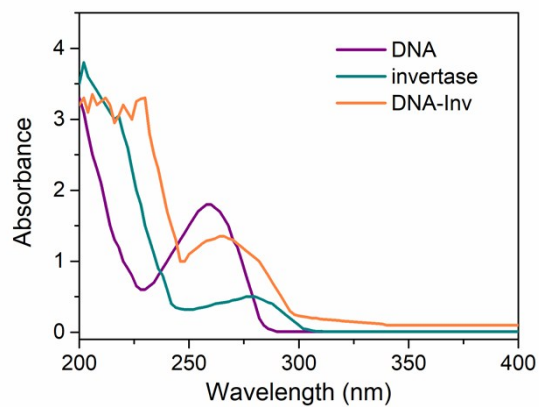

**Figure S1.** Absorption spectra of the thiol-DNA, invertase, and DNA-Inv conjugate.

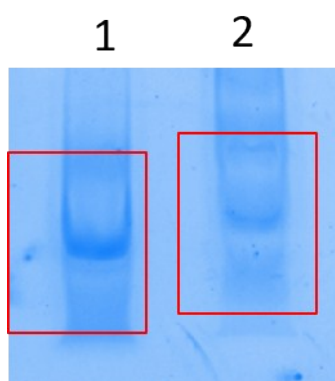

**Figure S2.** 6% SDS PAGE images of invertase and DNA-Inv conjugate. Lane 1: invertase; Lane 2: DNA-Inv conjugate.

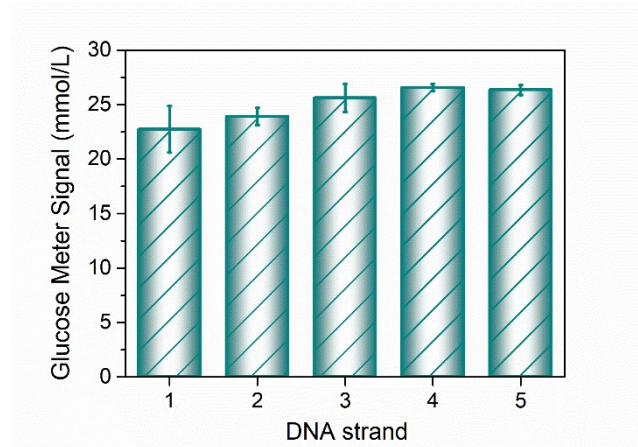

**Figure S3.** The effect of MBs-DNA-Inv probes immobilized with different DNA strand 1-5 with different lengths of adenine domain (5, 10, 15, 20, 25) for the target miRNA-21 detection assay. Data are means  $\pm$  SD (n=3).

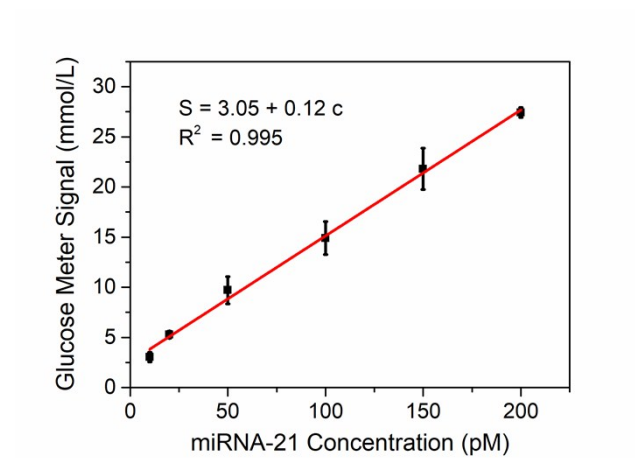

**Figure S4.** Linear relationship between the concentration of added miRNA-21 in urine from healthy mice and PGM signal. Data are means  $\pm$  SD (n=3).

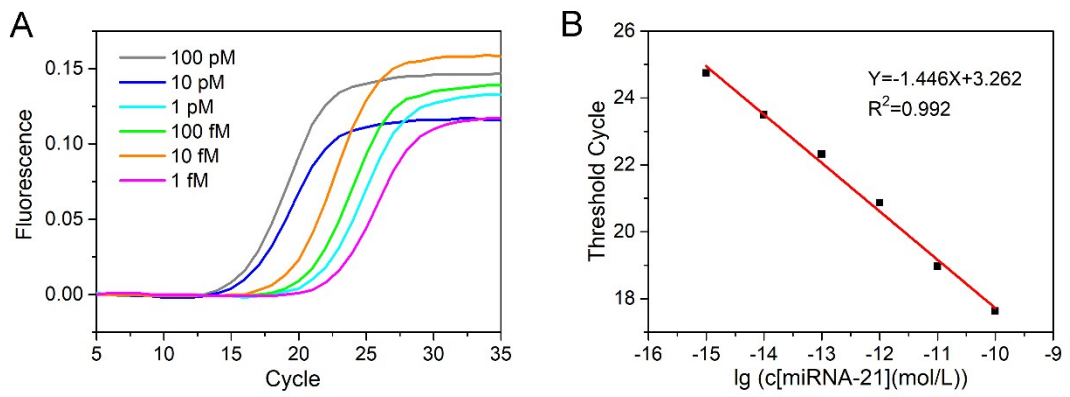

**Figure S5.** (A) Real-time qRT-PCR curves of different concentrations of target miRNA-21, which has been converted to cDNA before amplification. (B) The linear relationship between the miRNA-21 concentration and the threshold cycle.

## References

1. M. H. Shamsi, K. Choi, A. H. Ng, M. D. Chamberlain, A. R. Wheeler, *Biosens. Bioelectron.*, 2016, **77**, 845-852.
2. S. Song, Z. Liang, J. Zhang, L. Wang, G. Li and C. Fan, *Angew. Chem. Int. Ed.*, 2009, **48**, 8670-8674.
3. J. Lee, G. Park and D-H. Min, *Chem. Commun.*, 2015, **51**, 14597-146001.
4. Q. Wang, B.C. Yin and B.C. Ye, *Biosens. Bioelectron.*, 2016, **80**, 366-372.
5. X. Li, H. Zhang, Y. Tang, P. Wu, S. Xu and X.F. Zhang, *ACS Sens.*, 2017, **2**, 810-816.
6. J. Lei, L. Shi, B.X. Li, C.Y.J. Yang and Y. Jan, *Biosens. Bioelectron.*, 2018, **122**, 32-36.
